# Supplementary material
Source: Springer Nature journal article supplement (https://www.springermedizin.de/resource/supplementary/13054_2010_8389_MOESM8_ESM.pdf/9731852)

% change

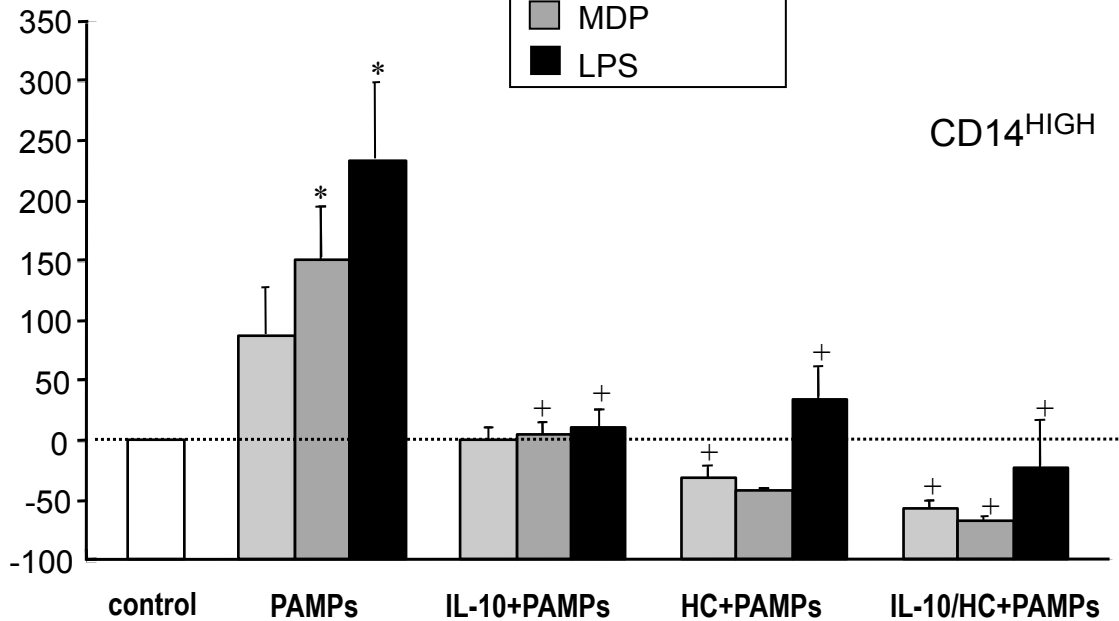

% change

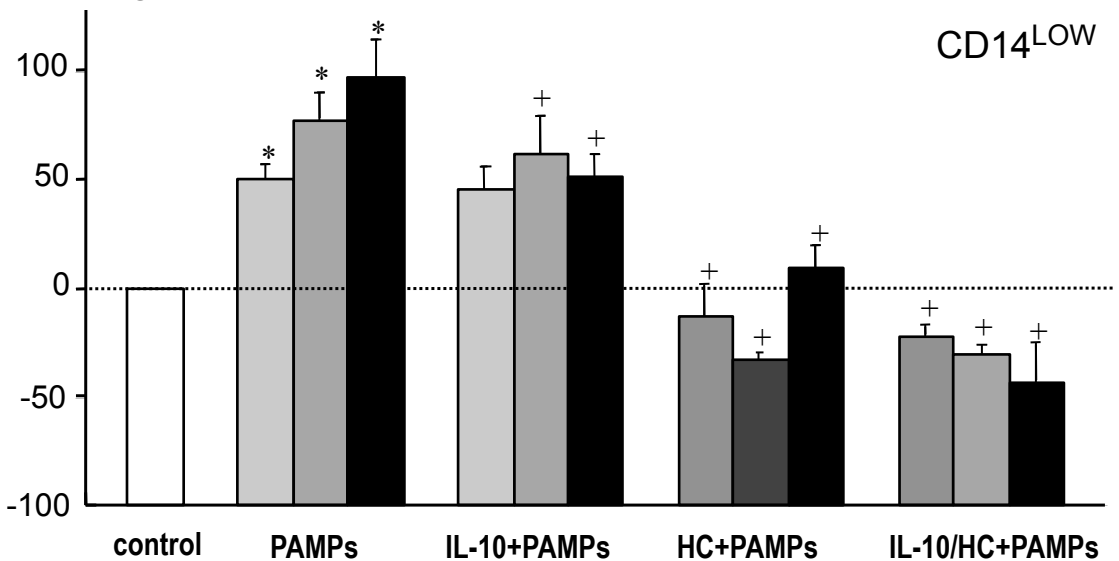

Supplement: MOESM8 [file 9731852]
